# Supplementary material
Source: PubMed Central journal article supplement (PMC3365994)

## Supplemental Table 1

**Kinetic analysis of FRAP in transfected CHO cells expressing PSGL-1-YFP constructs**

| PSGL-1/cell treatment | $\tau^a$ (s)        | $F_{\max}^b$           |
|-----------------------|---------------------|------------------------|
| WT/DMSO               | 88 ± 8              | 0.7 ± 0.0              |
| WT/Latrunculin B      | 61 ± 4 <sup>c</sup> | 0.8 ± 0.0 <sup>c</sup> |
| SRKS/DMSO             | 97 ± 5              | 0.8 ± 0.0 <sup>c</sup> |
| SRKS/Latrunculin B    | 58 ± 3 <sup>c</sup> | 0.8 ± 0.0 <sup>c</sup> |
| MYVR/DMSO             | 60 ± 8              | 0.7 ± 0.0              |
| MYVR/Latrunculin B    | 62 ± 2              | 0.8 ± 0.0              |

<sup>a</sup> Time constant for fluorescence recovery

<sup>b</sup> Maximum fluorescence recovery

<sup>c</sup>  $P < 0.01$  compared to WT

FRAP curves (see Supplemental Figure 1) from 5 independent trials with 3 to 5 measurements per trial were fitted to a function for monoexponential recovery of fluorescence (see Materials and methods) to derive  $\tau$  and  $F_{\max}$ . The data represent the mean ± SEM.

## Supplemental figure legends

Supplemental Figure 1. **Juxtamembrane residues in the cytoplasmic domain of PSGL-1 restrain its membrane mobility.** Plot of normalized fluorescence intensity values vs. time after photobleaching a small area of peripheral membrane of transfected CHO cells expressing the indicated PSGL-1-YFP construct in the presence or absence of DMSO or latrunculin B (Lat B). The symbols for SRKS/DMSO and SRKS/Lat B are offset slightly to the left for clarity. The experimental conditions were similar to those in Figure 1D and Figure 2, except that a smaller area of plasma membrane ( $12 \mu\text{m}^2$ ) was photobleached. FRAP curves from 5 independent trials with 3 to 5 measurements per trial were fitted to a function for monoexponential recovery of fluorescence (see Materials and methods) to derive  $\tau$  and  $F_{\text{max}}$  as reported in Supplemental Table 1. The data represent the mean  $\pm$  SEM.

Supplemental Figure 2. **BMDMs express myeloid and macrophage markers and integrins  $\alpha_M\beta_2$  and  $\alpha_L\beta_2$ .** (A and B) BMDMs were incubated with the indicated FITC-labeled mAb and analyzed by flow cytometry. The data are representative of three experiments.

Supplemental Figure 3. **Treating cells with latrunculin B disrupts the organization of actin filaments.** Murine bone marrow neutrophils (A), murine BMDMs (B), or human neutrophils (C) were untreated or treated with DMSO or latrunculin B (Lat B). The cells were then permeabilized, fixed, stained with PE-conjugated phalloidin, and analyzed by confocal microscopy. The data are representative of three experiments. Scale bar,  $2 \mu\text{m}$ .

Supplemental Figure 4. **Treating neutrophils or BMDMs with latrunculin B does not alter global surface expression of PSGL-1.** Murine neutrophils, BMDMs, or human neutrophils were incubated with DMSO or latrunculin B and then fixed. Murine neutrophils and BMDMs were incubated with PE-conjugated anti-murine PSGL-1 mAb 2PH1 or an isotype control mAb. Human neutrophils were incubated with anti-human PSGL-1 mAb PL1 or an isotype control mAb and then with FITC-conjugated goat-anti-murine IgG. The cells were analyzed by flow cytometry. The data are representative of three experiments.

Supplemental Figure 1

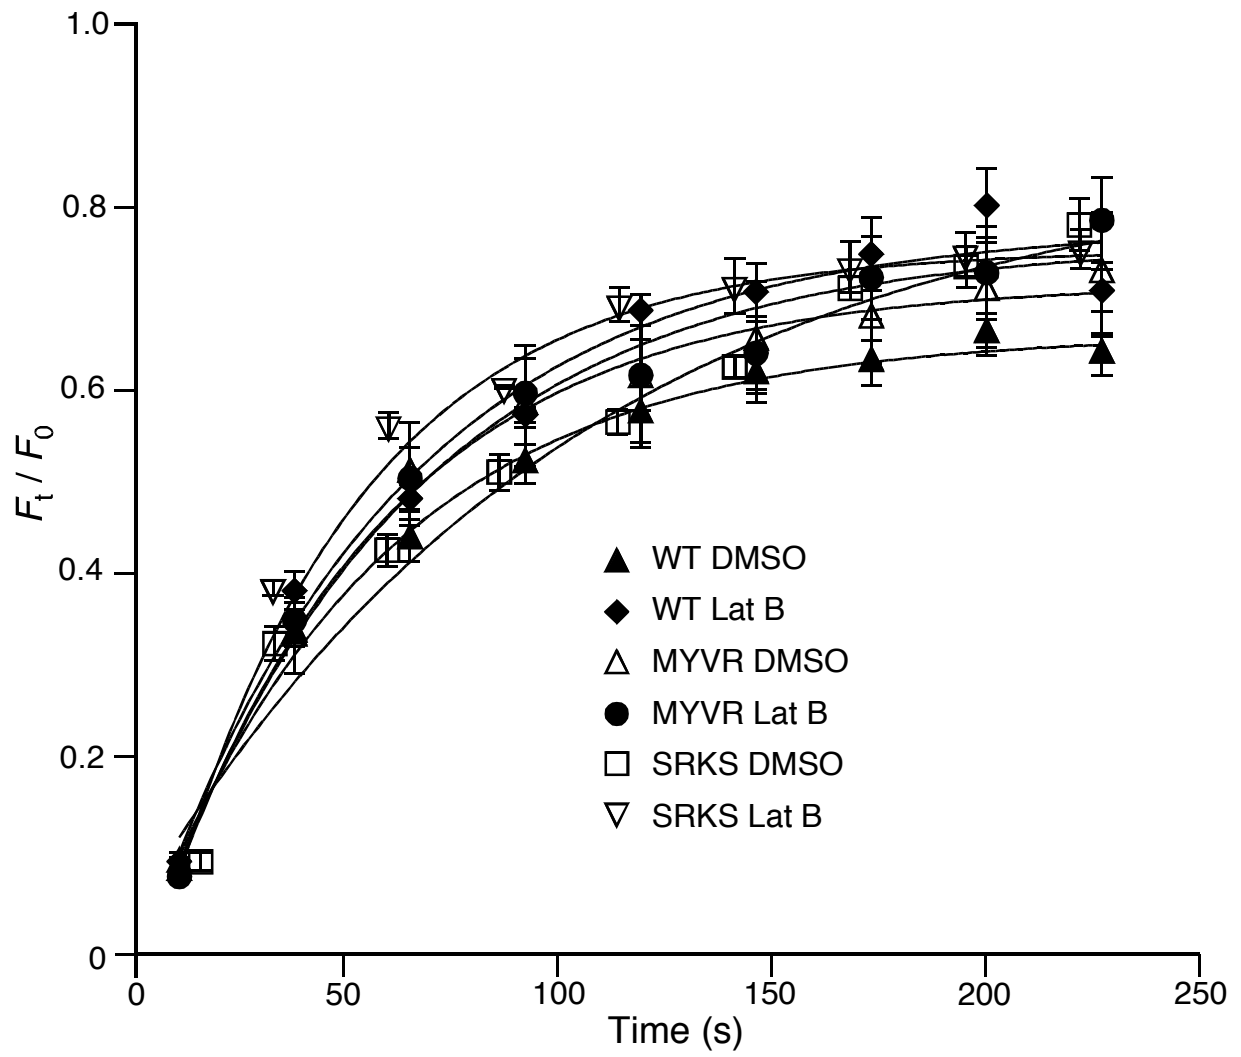

## Supplemental Figure 2

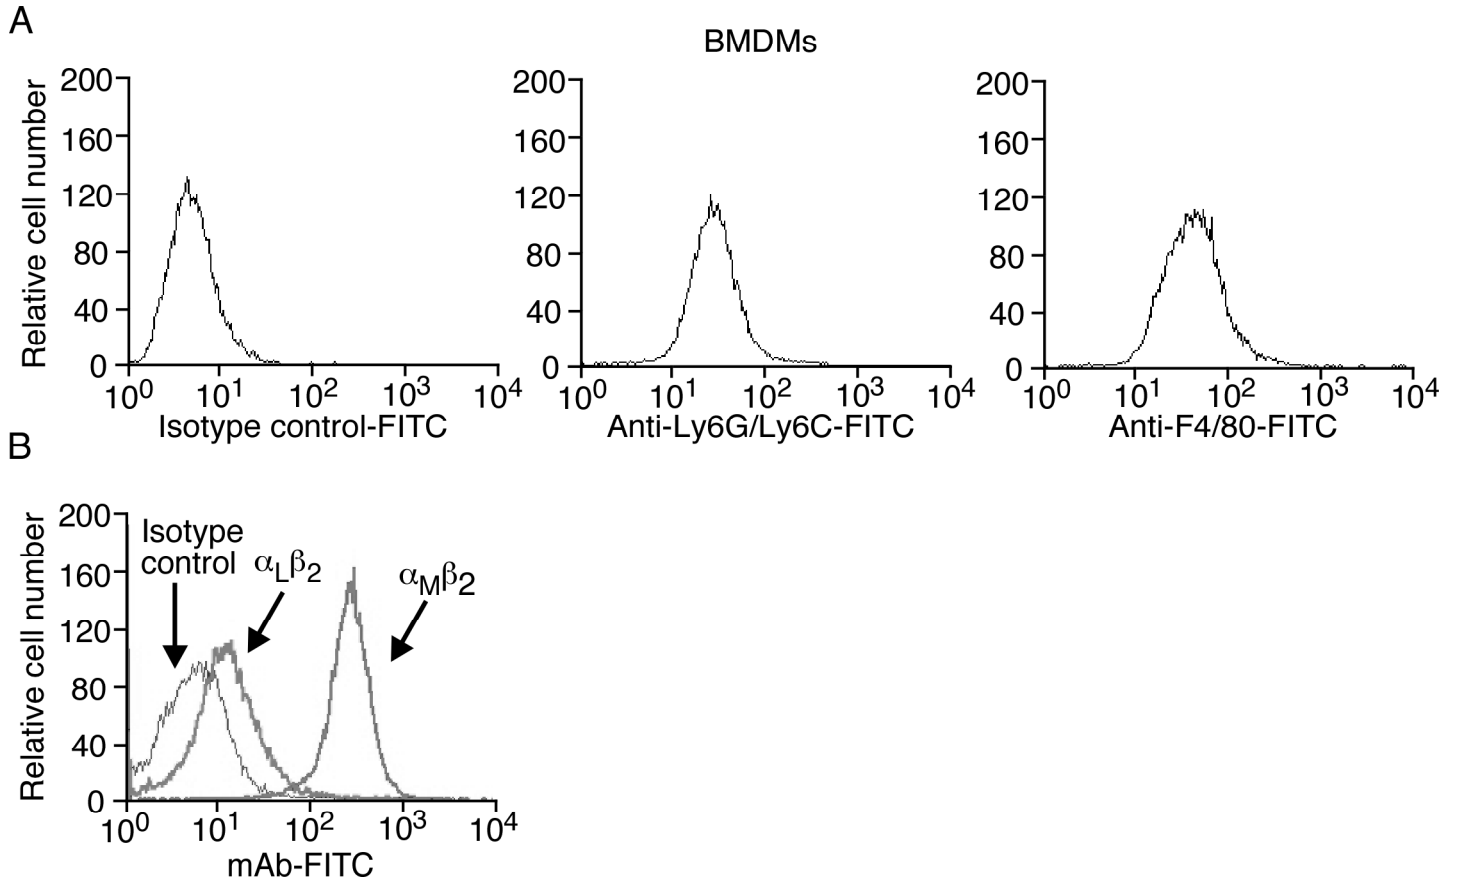

# Supplemental Figure 3

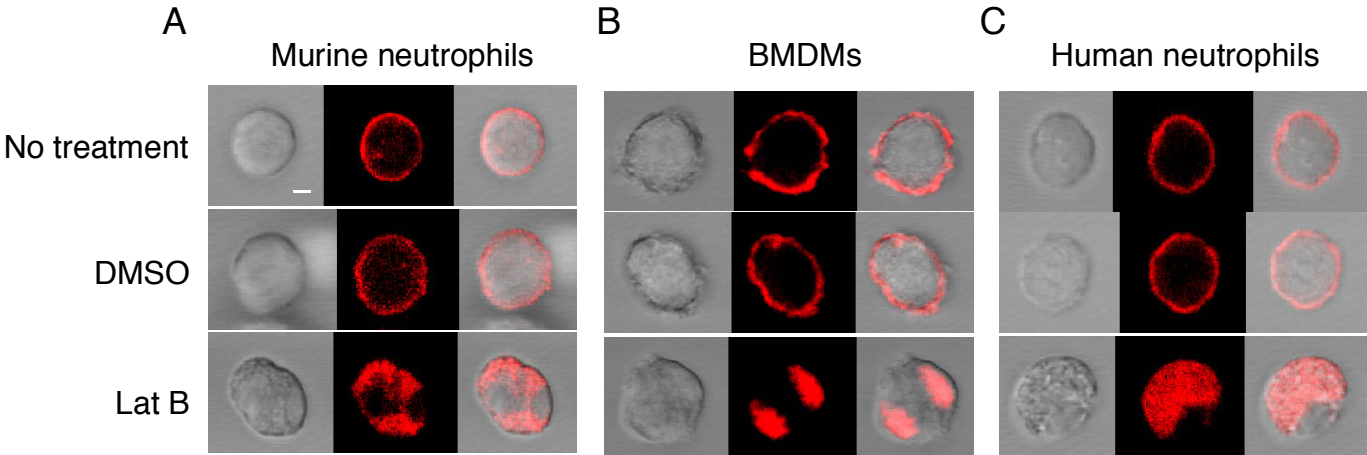

# Supplemental Figure 4

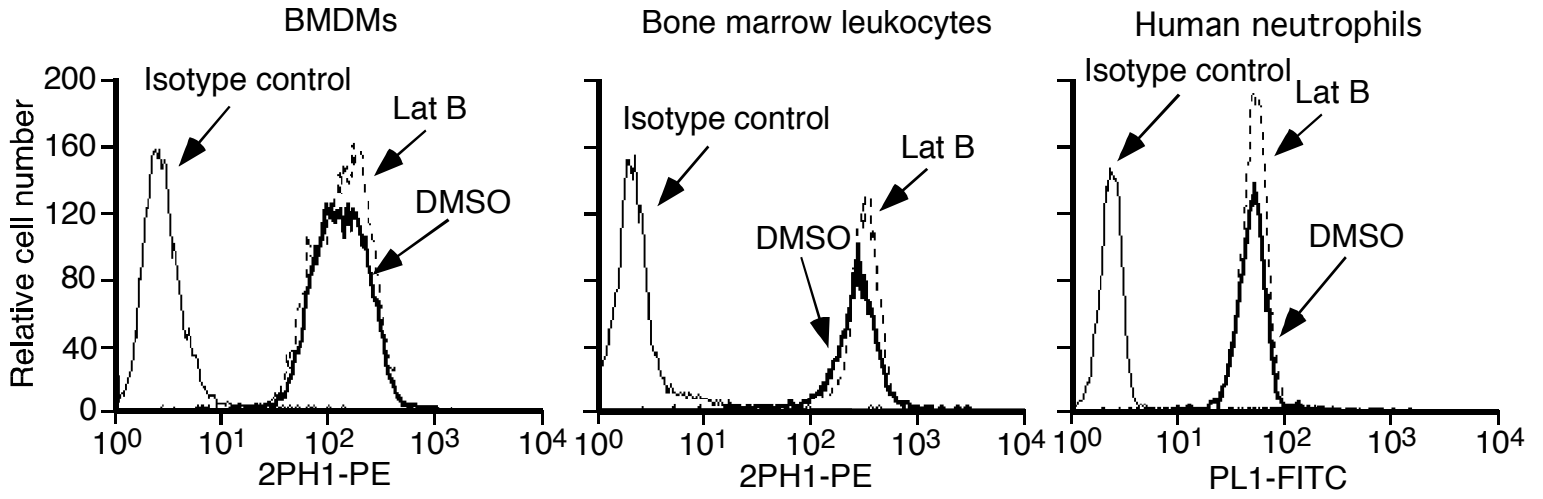

Supplement: supp_M112.361519_jbc.M112.361519-1.pdf [file supp_M112.361519_jbc.M112.361519-1.pdf]
